# Supplementary material for: Sarcomere Lattice Geometry Influences Cooperative Myosin Binding in Muscle
Source: PLOS journal article supplement (doi:10.1371/journal.pcbi.0030115), 2007-07-03
Supplement: S1 (10.1371/journal.pcbi.0030115.s001) [file journal.pcbi.0030115.s001]

| **Supplemental Table 1**- Comparisons of predictions to published experimental values. | | | | | |
| --- | --- | --- | --- | --- | --- |
|  | ATPase# | *fxb** | Model force‡ | Relative force** | Stress† |
| Multi | 3.90.2 | 0.1010.002 | 958.532.3 | 20.07 | 1716 |
| Two | 0.030.12 | 0.0150.014 | 9.28.2 | 0.460.41 | - |
| Simple | 1.40.1 | 0.033.001 | 436.123.4 | 0.610.03 | 774 |
| Super | 1.60.1 | 0.034.002 | 450.523.7 | 0.630.03 | 804 |
| Published | 3.5[42] | 0.1-0.2[34,36] | - | 1.7-2.8[25,34] | 175-256[29,36,42] |
| # 1 ATP consumed per cross-bridge cycle (ATPs-1 myosin-1) | | | | | |
| * fraction of bound cross bridges (*fxb*) | | | | | |
| ‡ total model force (pN) | | | | | |
| **force per total myosin (pN myosin-1) | | | | | |
| †Tensile stress (force per cross-sectional area). All multi-filament models represent an area of 5600 nm2 (1kPa=1mN mm-2). The area represented by the two-filament model is undefined. | | | | | |
