# Supplementary material for: Sarcomere Lattice Geometry Influences Cooperative Myosin Binding in Muscle
Source: PLOS journal article supplement (doi:10.1371/journal.pcbi.0030115), 2007-07-03
Supplement: S2 (10.1371/journal.pcbi.0030115.s002) [file journal.pcbi.0030115.s002]

**Supplemental Table 2-** Parameter values for Hill fits to steady-state model predictions*.

| Data Set | nH | | | | pCa50 | | | |
| --- | --- | --- | --- | --- | --- | --- | --- | --- |
|  | Multi | Two | Simple | Super | Multi | Two | Simple | Super |
| Normalized force | 1.03 | 1.08 | 0.95 | 1.06 | 6.04 | 6.09 | 6.06 | 6.11 |
| *fa†* | 1.01 | 1.01 | 1.01 | 1.0 | 6.06 | 6.04 | 6.04 | 6.05 |
| *fxb‡* | 1.02 | 1.08 | 0.95 | 1.04 | 6.08 | 6.09 | 6.08 | 6.12 |
| Cross-bridge turnover** | 1.0 | 1.2 | 0.98 | 1.01 | 6.23 | 6.2 | 6.16 | 6.15 |
| *Data are summarized by curve fitting parameters (Eq. 22) that indicate slope (*nH*) at half maximum (midpoint=*pCa50*) for data shown in Fig. 5 and Fig.6*.* | | | | | | | | |
| †fraction of actin nodes available to bind myosin (*fa*) | | | | | | | | |
| ‡fraction of bound cross-bridges (*fxb*) | | | | | | | | |
| **1 ATP consumed per cross-bridge cycle (ATP s-1 myosin-1) | | | | | | | | |
